# Supplementary material for: The Potential Mechanisms behind Loperamide-Induced Cardiac Arrhythmias Associated with Human Abuse and Extreme Overdose
Source: MDPI journal article supplement (doi:10.3390/biom13091355), 2023-09-06
Supplement: s1 [file s1]

Supplementary table 1. Electrophysiological effects of vehicle (n=6) and loperamide (n=6) on the Isolated Arterially Perfused Rabbit Left Ventricular Wedge.

|                            | Vehicle   |            |            |            |            | Loperamide  |             |              |               |            |
|----------------------------|-----------|------------|------------|------------|------------|-------------|-------------|--------------|---------------|------------|
| Concentrations             | 0.00%     | 0.00%      | 0.01%      | 0.03%      | 0.10%      | 0.1 $\mu$ M | 0.3 $\mu$ M | 1 $\mu$ M    | 3 $\mu$ M     | 10 $\mu$ M |
| <b>JT-interval</b>         | 1 $\pm$ 1 | 2 $\pm$ 2  | 2 $\pm$ 2  | 3 $\pm$ 3  | 3 $\pm$ 3  | 3 $\pm$ 2   | 6 $\pm$ 4   | 3 $\pm$ 5    | -12 $\pm$ 9*  | -          |
| <b>rTp-Te</b>              | 0 $\pm$ 1 | -1 $\pm$ 2 | -2 $\pm$ 2 | -3 $\pm$ 4 | -5 $\pm$ 2 | 1 $\pm$ 2   | -6 $\pm$ 4  | -19 $\pm$ 9* | -37 $\pm$ 15* | -          |
| <b>TdP Score</b>           | 0 $\pm$ 0 | 0 $\pm$ 0  | 0 $\pm$ 0  | 0 $\pm$ 0  | -1 $\pm$ 1 | 0 $\pm$ 0   | 0 $\pm$ 1   | -1 $\pm$ 0*  | -1 $\pm$ 0*   | -1 $\pm$ 0 |
| <b>QRS rate dependency</b> | 0 $\pm$ 0 | 0 $\pm$ 0  | 0 $\pm$ 0  | 0 $\pm$ 0  | 0 $\pm$ 0  | 0 $\pm$ 0   | 1 $\pm$ 1   | 6 $\pm$ 4*   | 30 $\pm$ 23*  | -          |
| <b>JTp</b>                 | 1 $\pm$ 1 | 2 $\pm$ 2  | 2 $\pm$ 2  | 4 $\pm$ 4  | 5 $\pm$ 4  | 3 $\pm$ 2   | 8 $\pm$ 5*  | 8 $\pm$ 6    | -5 $\pm$ 13   | -          |

Data are expressed as % changes of the baseline value, and in MEAN $\pm$ SD ; -: no measurable; \* p<0.05
