# Supplementary material for: The Potential Mechanisms behind Loperamide-Induced Cardiac Arrhythmias Associated with Human Abuse and Extreme Overdose
Source: MDPI journal article supplement (doi:10.3390/biom13091355), 2023-09-06
Supplement: s1 [file s1]

**Supplementary table 2.** Effects of vehicle (n=6) and loperamide (i.v. injection; n=6) in heart rate (HR), mean arterial blood pressure (MBP), and ECG parameters in Anesthetized Guinea-Pigs

|                  | Vehicle   |           |           |           |           |           | Loperamide |            |            |            |           |         |
|------------------|-----------|-----------|-----------|-----------|-----------|-----------|------------|------------|------------|------------|-----------|---------|
| Doses            | 0.5 ml/kg | 0.16 mg/kg | 0.32 mg/kg | 0.63 mg/kg | 1.25 mg/kg | 2.5 mg/kg | 5 mg/kg |
| Time (min)       | 0         | 15        | 30        | 45        | 60        | 75        | 0          | 15         | 30         | 45         | 60        | 75      |
| HR               | -3±5      | -5±6      | -9±4      | -9±6      | -10±6     | -9±7      | 13±10*     | 12±11*     | 6±10*      | -2±11      | -16±13    | -33±17* |
| MBP              | -4±10     | 1±9       | 2±13      | 2±7       | 1±13      | 6±8       | 71±46*     | 53±30*     | 30±27      | 0±22       | -38±19*   | -55±22* |
| QT-interval      | 3±5       | 6±9       | 7±5       | 10±10     | 11±11     | 13±12     | -8±8*      | -7±9*      | -2±9       | 6±11       | 27±17     | 58±26*  |
| Body Temperature | -0.3±0.5  | -1.1±0.7  | -1.7±1    | -2.7±1.4  | -3±1.6    | -3.4±1.8  | -1±0*      | -2±0*      | -2.9±0.7   | -3.4±0.5   | -4±0.6    | -4±0.8  |
| RR-interval      | 2±7       | 5±7       | 8±5       | 9±8       | 10±9      | 10±9      | -10±9*     | -10±8*     | -5±9*      | 4±13       | 24±21     | 57±40*  |

\* p<0.05. HR: heart rate, MBP: mean arterial blood pressure.

Data are expressed as % changes of the baseline value and in Mean±SD.
