# Supplementary material for: The Potential Mechanisms behind Loperamide-Induced Cardiac Arrhythmias Associated with Human Abuse and Extreme Overdose
Source: MDPI journal article supplement (doi:10.3390/biom13091355), 2023-09-06
Supplement: s1 [file s1]

**Table S2.** The cardiac electrophysiological effects of loperamide in-silico modeling.

Data are expressed as stimulated median values. FTPC: free therapeutic plasma concentration.

| Parameters                                | Reference              | Modeling concentration<br>(fold: x over its FTPC of Loperamide) |                             |                             |
|-------------------------------------------|------------------------|-----------------------------------------------------------------|-----------------------------|-----------------------------|
|                                           | 0 $\mu$ M<br>(0x FTPC) | 0.1 $\mu$ M<br>(400xFTPC)                                       | 0.25 $\mu$ M<br>(1000xFTPC) | 0.35 $\mu$ M<br>(1400xFTPC) |
| Loperamide alone                          |                        |                                                                 |                             |                             |
| Peak Voltage. (mV)                        | 43.2968                | 42.0121                                                         | 41.55261                    | 41.2189                     |
| RMP (mV)                                  | -87.8071               | -87.809                                                         | -87.8099                    | -87.8083                    |
| APD <sub>90</sub> (ms)                    | 357.97                 | 396.05                                                          | 462.58                      | 503.545                     |
| APD <sub>50</sub> (ms)                    | 280.31                 | 311                                                             | 360                         | 390.435                     |
| APD <sub>40</sub> (ms)                    | 253.68                 | 279.18                                                          | 318.37                      | 341.34                      |
| Triangulation <sub>90-40</sub> (ms)       | 101.99                 | 115.29                                                          | 141.92                      | 161.3                       |
| EAD (incidence: number of cells with EAD) | 0                      | 0                                                               | 0                           | 1                           |
| Loperamide and x1 FPTC of Hydroxyzine     |                        |                                                                 |                             |                             |
| Peak Voltage. (mV)                        | 43.2968                | 42.0196                                                         | 41.5302                     | 41.2652                     |
| RMP (mV)                                  | -87.8073               | -87.8084                                                        | -87.8085                    | -87.8086                    |
| APD <sub>90</sub> (ms)                    | 364.145                | 402.73                                                          | 469.615                     | 511.235                     |
| APD <sub>50</sub> (ms)                    | 285.47                 | 315.16                                                          | 364.71                      | 395.875                     |
| APD <sub>40</sub> (ms)                    | 257.315                | 282.79                                                          | 321.8                       | 345.64                      |
| Triangulation <sub>90-40</sub> (ms)       | 104.75                 | 118.42                                                          | 145.555                     | 165.695                     |
| EAD (incidence: number of cells with EAD) | 0                      | 0                                                               | 0                           | 1                           |
| Loperamide and x2 FPTC of Hydroxyzine     |                        |                                                                 |                             |                             |
| Peak Voltage. (mV)                        | 43.3123                | 42.0467                                                         | 41.5725                     | 41.3162                     |
| RMP (mV)                                  | -87.8069               | -87.8084                                                        | -87.807                     | -87.8089                    |
| APD <sub>90</sub> (ms)                    | 370.18                 | 409.675                                                         | 477.13                      | 519.06                      |
| APD <sub>50</sub> (ms)                    | 289.58                 | 319.695                                                         | 369.095                     | 400.98                      |
| APD <sub>40</sub> (ms)                    | 261.28                 | 286.54                                                          | 325.495                     | 349.535                     |
| Triangulation <sub>90-40</sub> (ms)       | 107.47                 | 121.68                                                          | 148.84                      | 169.815                     |
| EAD (incidence: number of cells with EAD) | 0                      | 0                                                               | 1                           | 1                           |
| Loperamide and x3 FPTC of Hydroxyzine     |                        |                                                                 |                             |                             |
| Peak Voltage. (mV)                        | 43.3237                | 42.09                                                           | 41.6114                     | 41.3459                     |
| RMP (mV)                                  | -87.8063               | -87.8081                                                        | -87.8069                    | -87.8111                    |
| APD <sub>90</sub> (ms)                    | 376.02                 | 415.56                                                          | 484.635                     | 526.975                     |
| APD <sub>50</sub> (ms)                    | 293.58                 | 323.955                                                         | 373.94                      | 405.345                     |
| APD <sub>40</sub> (ms)                    | 264.84                 | 290.015                                                         | 328.89                      | 352.275                     |
| Triangulation <sub>90-40</sub> (ms)       | 110.06                 | 124.59                                                          | 152.54                      | 174.365                     |
| EAD (incidence: number of cells with EAD) | 0                      | 0                                                               | 1                           | 3                           |
